# Supplementary material for: Expression and regulation of recently discovered hyaluronidases, HYBID and TMEM2, in chondrocytes from knee osteoarthritic cartilage
Source: PubMed Central journal article supplement (PMC9568606; doi:10.1038/s41598-022-22230-z), 2022-10-14
Supplement: 41598_2022_22230_MOESM1_ESM.pdf [file 41598_2022_22230_MOESM1_ESM.pdf]

# Supplementary Figure S1

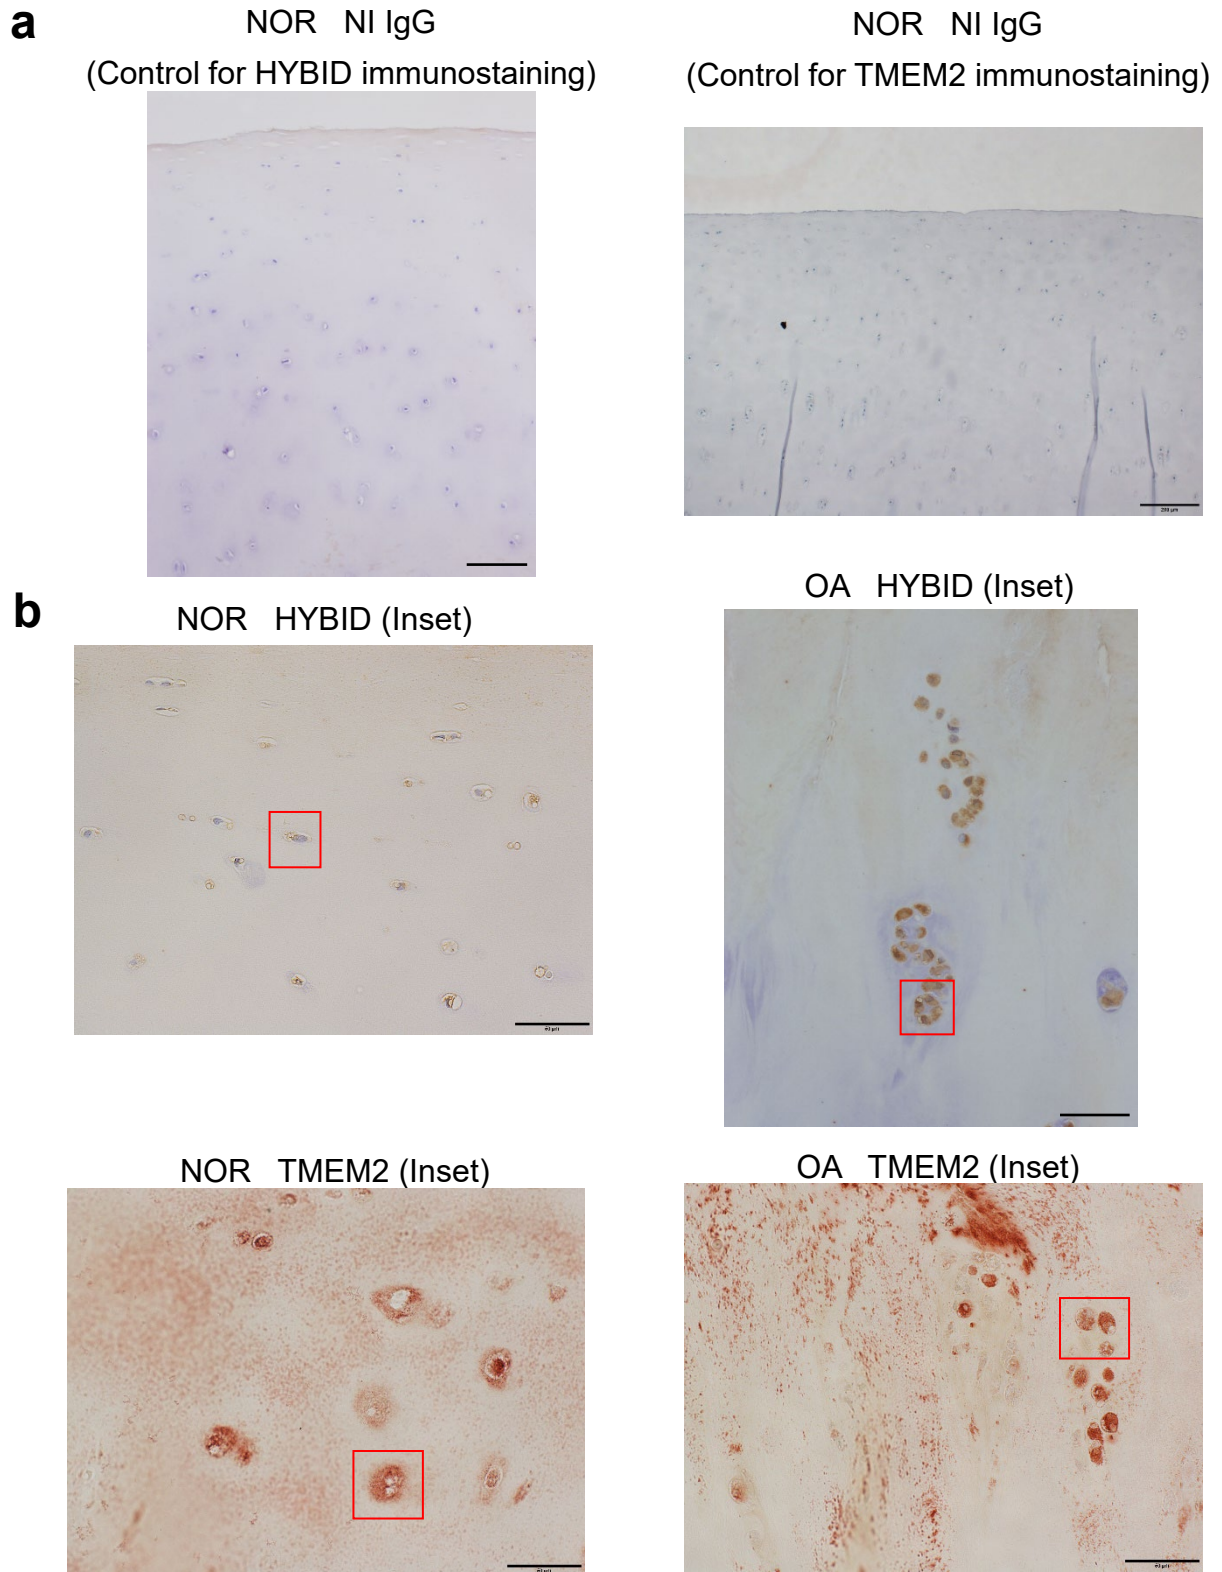

**Supplementary Figure S1. (a)** Immunostaining of normal cartilage (NOR) with rabbit non-immune (NI) IgG. Paraffin sections were immunostained with NI IgG after antigen retrieval and blocking nonspecific reactions. Note only background staining in the cartilage. Bar, 200 µm. **(b)** Original full-length images for insets in Figure 1c and 1d. Boxed areas were used for insets. Bar, 50 µm.

## Supplementary Figure S2

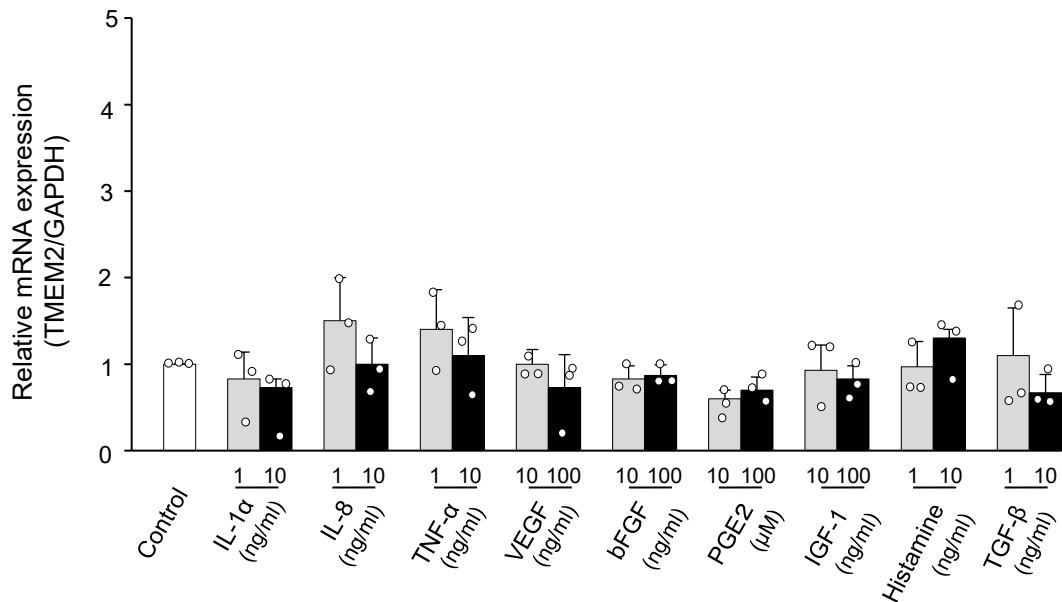

**Supplementary Figure S2.** Quantitative real-time PCR analysis of TMEM2 expression in OA chondrocytes after treatment with the factors. OA chondrocytes at P2 were treated with IL-1 $\alpha$  (1 and 10 ng/ml), IL-8 (1 and 10 ng/ml), TNF- $\alpha$  (1 and 10 ng/ml) VEGF (10 and 100 ng/ml), bFGF (10 and 100 ng/ml), PGE2 (10 and 100  $\mu$ M), IGF-1 (10 and 100 ng/ml), histamine (1 and 10 ng/ml) or TGF- $\beta$  (1 and 10 ng/ml) for 24 h. Relative expression of TMEM2 was determined by normalizing the samples to the expression level of GAPDH transcripts using the  $\Delta\Delta$ Ct method. The mean TMEM2:GAPDH ratio in control chondrocytes treated with vehicle alone was set at 1. Note negligible changes in the expression by treatment with the factors.

# Supplementary Figure S3

## Full-length gels for **Figure 2b** (HYBID and GAPDH)

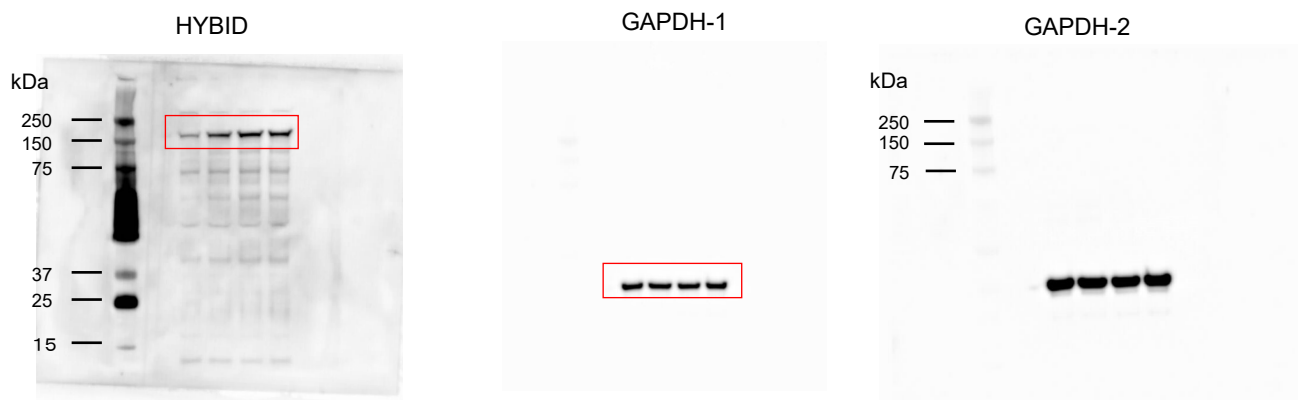

## Full-length gels for **Figure 2c** (HYBID and GAPDH)

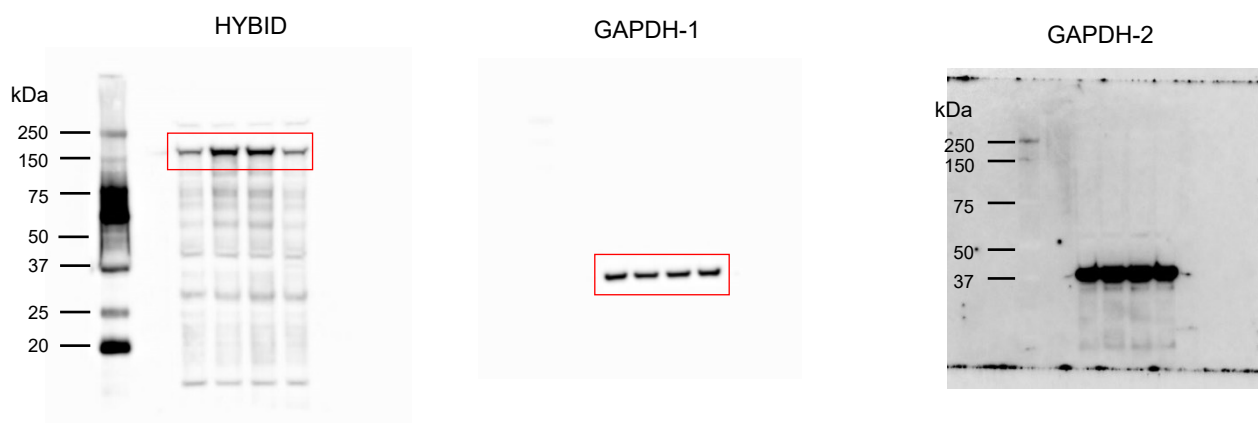

## Full-length gels for **Figure 2e** (TMEM2 and GAPDH)

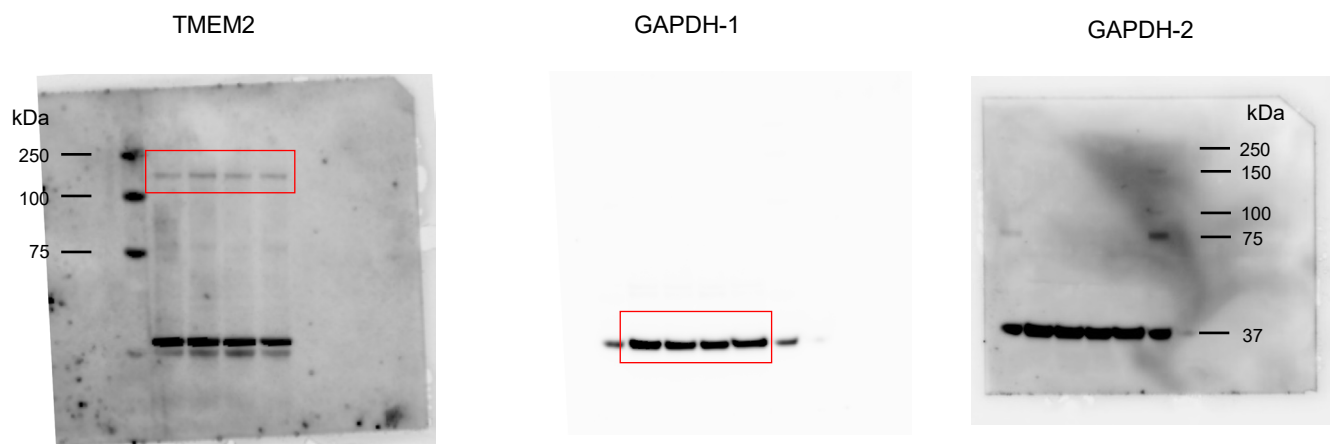

**Supplementary Figure S3.** Full-length gels corresponding to **Figure 2b, 2c and 2e**. For the final figures, Adobe Photoshop was used to crop the indicated bands (red lines) and the bands were placed in **Figure 2b, 2c and 2e**. GAPDH-2 shows an image captured after a longer exposure. Immunoblotting for GAPDH of **Figure 2e** was performed by applying the same amounts of the samples to a different gel.

# Supplementary Figure S4

## Full-length gel for **Figure 3a** (HYBID and GAPDH)

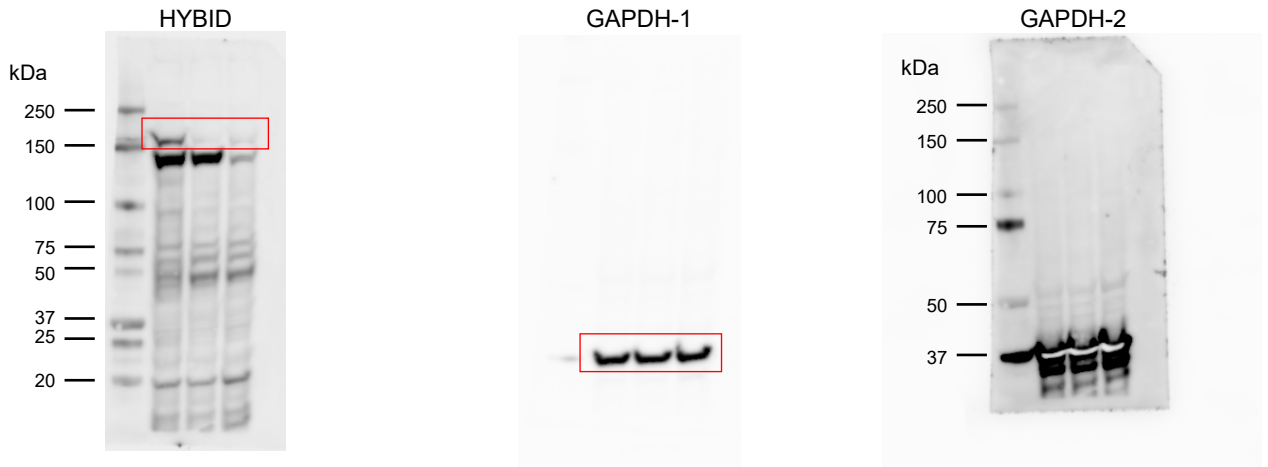

## Full-length gel for **Figure 3b** (TMEM2 and GAPDH)

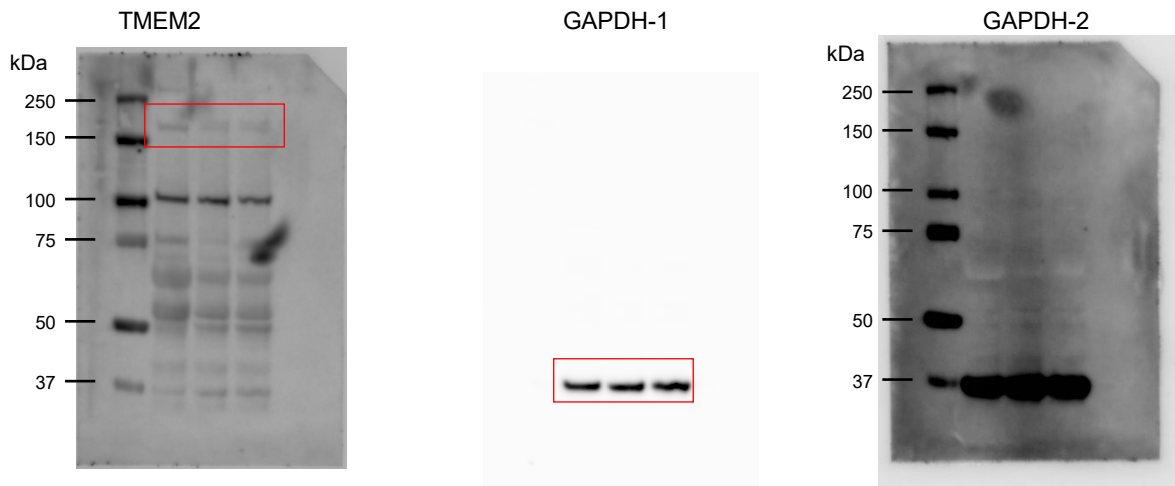

## Full-length gel for **Figure 3c** (HYBID and GAPDH)

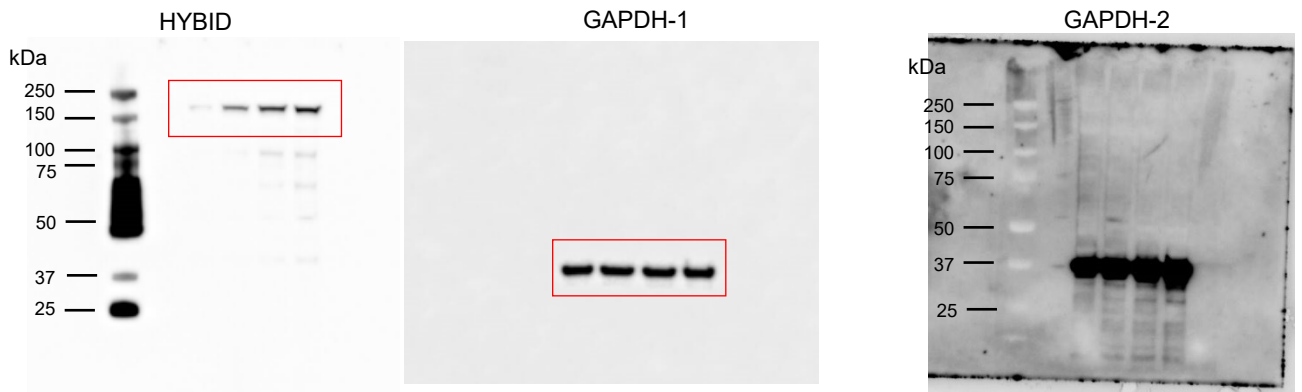

**Supplementary Figure S4.** Full-length gels corresponding to **Figure 3a**, **3b** and **3c**. For the final figures, Adobe Photoshop was used to crop the indicated bands (red lines) and the bands were placed in **Figure 3a**, **3b** and **3c**. GAPDH-2 shows an image captured after a longer exposure. Immunoblotting for GAPDH of **Figure 3a** was performed by applying the same amounts of the samples to a different gel.

## Supplementary Figure S5

Full-length gels for **Figure 4b** (HYBID and GAPDH)

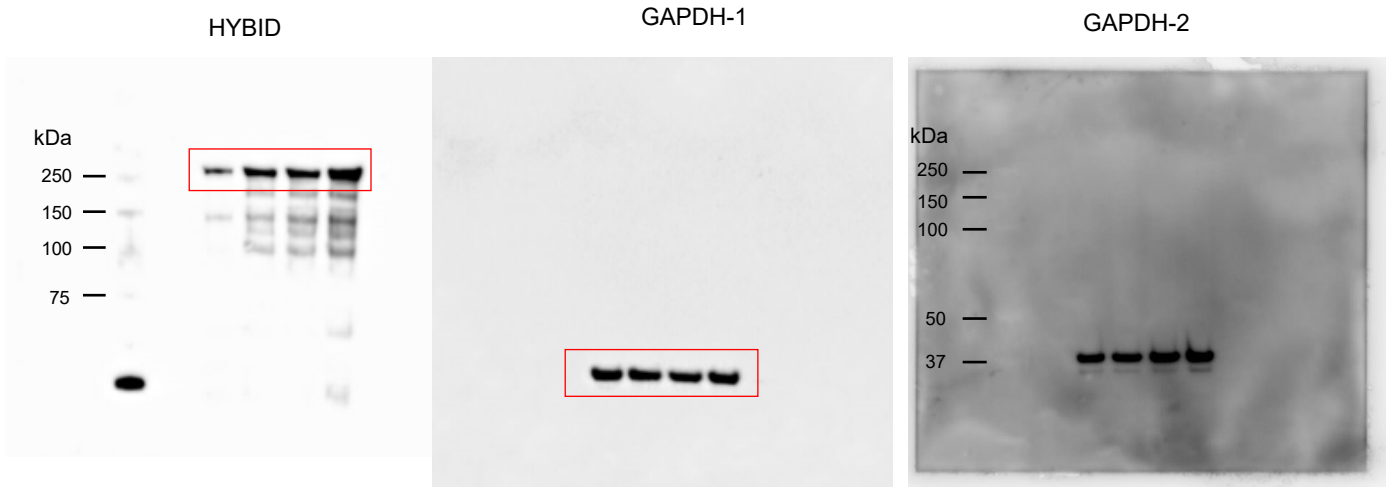

**Supplementary Figure S5.** Full-length gels corresponding to **Figure 4b**. For the final figures, Adobe Photoshop was used to crop the indicated bands (red lines) and the bands were placed in **Figure 4b**. GAPDH-2 shows an image captured after a longer exposure.

# Supplementary Figure S6

Full-length gels for **Figure 5e, left** (HYBID and GAPDH)

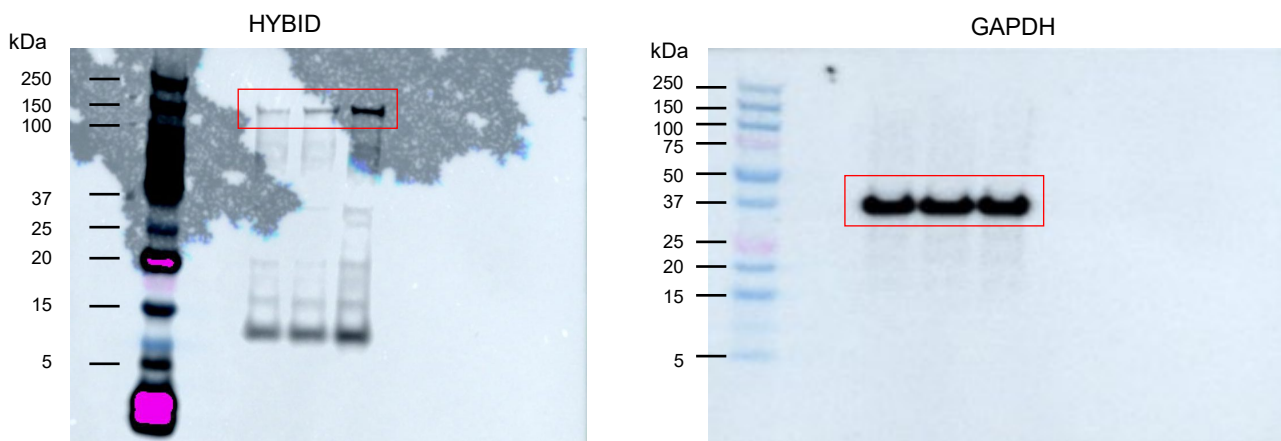

Full-length gels for **Figure 5e, right** (HYBID and GAPDH)

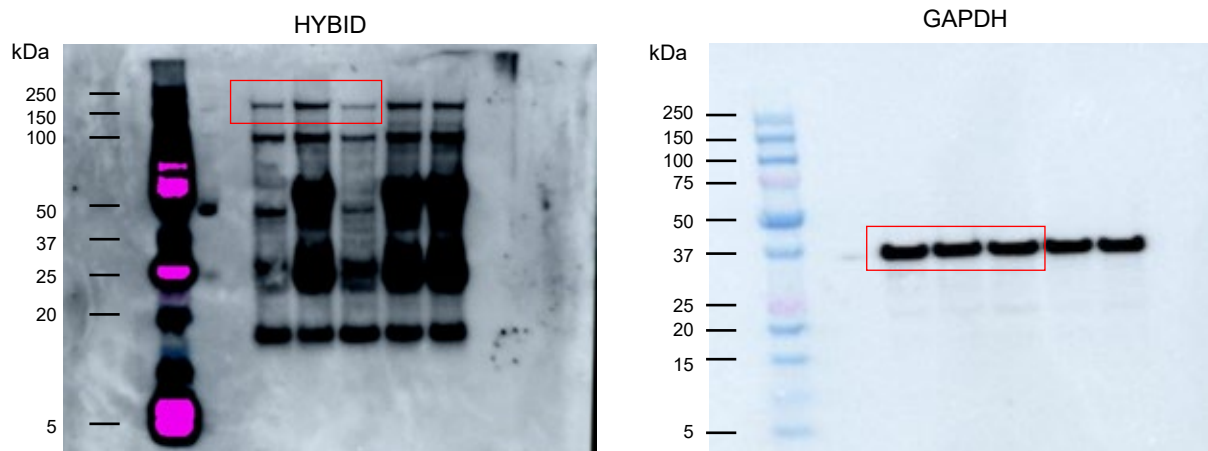

**Supplementary Figure S6.** Full-length gels corresponding to **Figure 5e**. For the final figures, Adobe Photoshop was used to crop the indicated bands (red lines) and the bands were placed in **Figure 5e**.
